# Supplementary material for: Ontogenetic variation in the diet of the anuran community from a semi-arid environment in the southeastern Chihuahuan Desert
Source: PeerJ. 2019 Oct 18;7:e7908. doi: 10.7717/peerj.7908 (PMC6802674; doi:10.7717/peerj.7908)
Supplement: Supplemental Information 4 [file peerj-07-7908-s004.xlsx]

## Sheet: Hoja1
			Number of prey items for each prey category																											Volume (mm3) for each prey category
Catalog (CHCIB) or field (XR) number	Species	SVL (mm)	Acari	Anura	Araneae	Aves	Coleoptera (A)	Coleoptera (L)	Collembola	Dermaptera	Diplopoda	Diptera (A)	Diptera (L)	Ephemeroptera	Hemiptera	Homoptera	Hymenoptera (Formicidae)	Hymenoptera (others)	Isopoda	Isoptera	Lepidoptera (A)	Lepidoptera (L)	Neuroptera (A)	Odonata	Orthoptera	Psocoptera	Scorpiones	Solifugae		Acari	Anura	Araneae	Aves	Coleoptera (A)	Coleoptera (L)	Collembola	Dermaptera	Diplopoda	Diptera (A)	Diptera (L)	Ephemeroptera	Hemiptera	Homoptera	Hymenoptera (Formicidae)	Hymenoptera (others)	Isopoda	Isoptera	Lepidoptera (A)	Lepidoptera (L)
CHCIB 3899	A. cognatus	81.93	0	0	0	0	2	0	0	0	0	0	0	0	0	0	0	0	0	0	0	0	0	0	0	0	0	0		0	0	0	0	2504.32	0	0	0	0	0	0	0	0	0	0	0	0	0	0	0
CHCIB 3900	A. cognatus	76	0	0	3	0	6	0	0	0	0	0	0	0	0	0	185	1	0	0	1	2	0	0	1	0	0	0		0	0	19.6499	0	123.966	0	0	0	0	0	0	0	0	0	2026.85	6.44746	0	0	12.6517	198.461
CHCIB 3901	A. cognatus	83.18	0	0	0	0	22	0	0	0	0	0	0	0	0	0	193	0	0	58	0	0	0	0	1	0	0	0		0	0	0	0	1448.17	0	0	0	0	0	0	0	0	0	4867.04	0	0	52.9516	0	0
CHCIB 3904	A. cognatus	66.42	0	0	0	0	1	0	0	0	0	0	0	0	0	0	0	0	0	0	0	0	0	0	0	0	0	0		0	0	0	0	117.043	0	0	0	0	0	0	0	0	0	0	0	0	0	0	0
CHCIB 3905	A. cognatus	58.7	0	0	0	0	2	0	0	0	0	0	0	0	0	0	0	0	0	0	0	0	0	0	0	0	0	0		0	0	0	0	74.4731	0	0	0	0	0	0	0	0	0	0	0	0	0	0	0
CHCIB 3906	A. cognatus	54.19	0	0	0	0	0	0	0	0	0	1	0	0	0	0	0	0	0	0	0	0	0	0	0	0	0	0		0	0	0	0	0	0	0	0	0	0.827006	0	0	0	0	0	0	0	0	0	0
CHCIB 3909	A. cognatus	54.11	0	0	1	0	4	0	0	0	0	3	0	0	2	1	73	0	0	0	0	0	0	7	0	0	1	0		0	0	0.92689	0	30.9992	0	0	0	0	0.887864	0	0	64.9497	3.90224	259.874	0	0	0	0	0
CHCIB 3910	A. cognatus	54.03	0	0	0	0	2	1	0	0	0	0	0	0	1	0	55	3	0	0	0	0	0	0	1	0	0	0		0	0	0	0	35.3784	22.8961	0	0	0	0	0	0	3.64965	0	556.812	31.554	0	0	0	0
CHCIB 5460	A. debilis	44.48	0	0	0	0	1	0	0	0	0	0	0	0	0	0	89	0	0	0	0	0	0	0	0	0	0	0		0	0	0	0	2.43602	0	0	0	0	0	0	0	0	0	41.9224	0	0	0	0	0
CHCIB 5461	A. debilis	40.98	0	0	0	0	0	0	0	0	0	0	0	0	0	0	6	0	0	0	0	0	0	0	0	0	0	0		0	0	0	0	0	0	0	0	0	0	0	0	0	0	2.87388	0	0	0	0	0
CHCIB 5462	A. debilis	44	0	0	0	0	0	0	0	0	0	0	0	0	0	0	0	0	0	0	0	1	0	0	0	0	0	0		0	0	0	0	0	0	0	0	0	0	0	0	0	0	0	0	0	0	0	1.63548
CHCIB 5463	A. debilis	45.68	0	0	0	0	0	0	0	0	0	0	0	0	0	0	40	0	0	123	0	0	0	0	0	0	0	0		0	0	0	0	0	0	0	0	0	0	0	0	0	0	21.084	0	0	35.3151	0	0
CHCIB 5464	A. debilis	43.53	0	0	0	0	1	0	0	0	0	0	0	0	0	0	0	0	0	0	0	0	0	0	0	0	0	0		0	0	0	0	34.7045	0	0	0	0	0	0	0	0	0	0	0	0	0	0	0
CHCIB 5469	A. debilis	36.37	0	0	0	0	0	0	0	0	0	0	0	0	0	0	4	0	0	0	0	0	0	0	0	0	0	0		0	0	0	0	0	0	0	0	0	0	0	0	0	0	3.75253	0	0	0	0	0
CHCIB 5470	A. debilis	37.91	0	0	0	0	0	0	0	0	0	0	0	0	0	0	16	0	0	1	0	0	0	0	0	0	0	0		0	0	0	0	0	0	0	0	0	0	0	0	0	0	25.9393	0	0	0.378734	0	0
CHCIB 5472	A. debilis	36.44	0	0	0	0	1	0	0	1	0	0	0	0	0	0	0	0	0	32	0	0	0	0	0	0	0	0		0	0	0	0	0.815422	0	0	0.0508926	0	0	0	0	0	0	0	0	0	21.9019	0	0
CHCIB 5473	A. debilis	33.08	0	0	0	0	0	0	0	0	0	0	0	0	0	0	5	0	0	28	0	0	0	0	0	0	0	0		0	0	0	0	0	0	0	0	0	0	0	0	0	0	3.58713	0	0	11.5346	0	0
CHCIB 5474	A. debilis	36.26	0	0	0	0	0	0	0	0	0	0	0	0	0	0	0	0	0	82	0	0	0	0	0	0	0	0		0	0	0	0	0	0	0	0	0	0	0	0	0	0	0	0	0	111.439	0	0
XR 01038	A. punctatus	51.66	0	0	0	0	3	0	0	0	0	0	0	0	1	0	13	1	0	0	0	0	0	0	0	0	0	0		0	0	0	0	58.9553	0	0	0	0	0	0	0	48.1011	0	84.0777	5.11997	0	0	0	0
XR 01044	A. punctatus	66.56	0	0	1	0	5	0	0	0	0	1	0	0	1	0	6	0	0	0	2	0	0	0	0	0	0	0		0	0	0.962738	0	307.806	0	0	0	0	21.5072	0	0	65.1077	0	46.3269	0	0	0	67.0711	0
CHCIB 3911	A. punctatus	52.63	0	0	0	0	0	0	0	0	0	0	0	0	0	0	57	0	0	0	0	0	0	0	0	0	0	0		0	0	0	0	0	0	0	0	0	0	0	0	0	0	301.958	0	0	0	0	0
CHCIB 3912	A. punctatus	70.92	0	0	0	0	0	0	0	0	0	0	0	0	0	0	264	0	1	0	0	0	0	0	1	0	0	0		0	0	0	0	0	0	0	0	0	0	0	0	0	0	1782.31	0	86.6758	0	0	0
CHCIB 3913	A. punctatus	52.17	0	0	0	0	0	0	0	0	0	0	0	0	0	0	233	0	0	0	0	0	0	0	0	0	0	0		0	0	0	0	0	0	0	0	0	0	0	0	0	0	839.137	0	0	0	0	0
CHCIB 3914	A. punctatus	53.25	0	0	0	0	0	0	0	0	0	0	0	0	0	0	36	0	0	0	0	1	0	0	0	0	0	0		0	0	0	0	0	0	0	0	0	0	0	0	0	0	162.213	0	0	0	0	1.73999
CHCIB 3915	A. punctatus	52.59	0	0	0	0	0	0	0	0	0	0	0	0	1	0	4	0	0	0	0	0	0	0	0	0	0	0		0	0	0	0	0	0	0	0	0	0	0	0	0.301122	0	2.58211	0	0	0	0	0
CHCIB 3918	A. punctatus	53.25	0	0	0	0	0	0	0	0	0	0	0	0	0	0	17	0	0	0	0	0	0	0	0	0	0	0		0	0	0	0	0	0	0	0	0	0	0	0	0	0	298.817	0	0	0	0	0
CHCIB 3919	A. punctatus	51.22	0	0	0	0	0	0	0	0	0	0	0	0	0	0	1	0	0	0	0	0	0	0	0	0	0	0		0	0	0	0	0	0	0	0	0	0	0	0	0	0	1.10477	0	0	0	0	0
CHCIB 3920	A. punctatus	51.97	0	0	0	0	2	0	0	0	0	0	0	0	0	0	18	0	0	0	0	0	0	0	0	0	0	0		0	0	0	0	13.1394	0	0	0	0	0	0	0	0	0	58.3427	0	0	0	0	0
CHCIB 3921	A. punctatus	49.85	0	0	0	0	0	0	0	0	0	0	0	0	0	0	160	0	0	0	0	0	0	0	0	0	0	0		0	0	0	0	0	0	0	0	0	0	0	0	0	0	202.03	0	0	0	0	0
CHCIB 3922	A. punctatus	54.59	0	0	0	0	0	0	0	0	0	0	0	0	0	0	194	0	0	0	0	0	0	0	0	0	0	0		0	0	0	0	0	0	0	0	0	0	0	0	0	0	326.715	0	0	0	0	0
CHCIB 3923	A. punctatus	57.55	0	0	0	0	1	0	0	0	0	0	0	0	0	0	11	0	0	0	0	17	0	0	0	0	0	0		0	0	0	0	32.1588	0	0	0	0	0	0	0	0	0	103.913	0	0	0	0	1566.11
CHCIB 3924	A. punctatus	52.42	0	0	0	0	1	0	0	0	0	0	0	0	0	0	89	0	0	0	0	0	0	0	0	0	0	0		0	0	0	0	14.9912	0	0	0	0	0	0	0	0	0	246.328	0	0	0	0	0
CHCIB 3925	A. punctatus	51.22	0	0	0	0	2	0	0	0	0	0	0	0	0	0	1	1	0	0	0	0	0	0	0	0	0	0		0	0	0	0	20.2308	0	0	0	0	0	0	0	0	0	0.630187	4.05402	0	0	0	0
CHCIB 3926	A. punctatus	52.48	0	0	0	0	3	0	0	0	0	0	0	0	0	0	25	0	0	0	0	2	0	0	0	0	0	0		0	0	0	0	61.8616	0	0	0	0	0	0	0	0	0	23.2054	0	0	0	0	38.3301
CHCIB 3928	A. punctatus	50.45	0	0	0	0	0	0	0	0	0	0	0	0	0	0	195	0	0	0	0	0	0	0	0	0	0	0		0	0	0	0	0	0	0	0	0	0	0	0	0	0	795.555	0	0	0	0	0
CHCIB 3929	A. punctatus	56.32	0	0	0	0	0	0	0	0	0	0	0	0	0	0	444	0	0	0	0	0	0	0	0	0	0	0		0	0	0	0	0	0	0	0	0	0	0	0	0	0	1960.71	0	0	0	0	0
CHCIB 3930	A. punctatus	52.07	0	0	0	0	2	0	0	0	0	0	0	0	0	0	192	0	0	0	0	0	0	0	0	0	0	0		0	0	0	0	66.907	0	0	0	0	0	0	0	0	0	507.26	0	0	0	0	0
CHCIB 3931	A. punctatus	56.93	0	0	0	0	0	0	0	0	0	0	0	0	0	0	1	0	0	0	0	0	0	0	0	0	0	0		0	0	0	0	0	0	0	0	0	0	0	0	0	0	3.91214	0	0	0	0	0
CHCIB 3932	A. punctatus	55.8	0	0	0	0	0	0	0	0	0	0	0	0	0	0	2	0	0	0	0	0	0	0	0	0	0	0		0	0	0	0	0	0	0	0	0	0	0	0	0	0	0.770385	0	0	0	0	0
CHCIB 3933	A. punctatus	63.88	0	0	0	0	0	0	0	0	0	0	0	0	0	0	4	0	0	0	0	0	0	0	0	0	0	0		0	0	0	0	0	0	0	0	0	0	0	0	0	0	40.4069	0	0	0	0	0
CHCIB 3934	A. punctatus	54.58	0	0	0	0	0	0	0	0	0	0	0	0	0	0	59	0	0	0	0	0	0	0	0	0	0	0		0	0	0	0	0	0	0	0	0	0	0	0	0	0	192.01	0	0	0	0	0
CHCIB 3935	A. punctatus	53.03	0	0	0	0	5	0	0	1	0	0	0	0	0	0	19	0	0	4	0	0	0	0	0	0	0	0		0	0	0	0	29.1393	0	0	15.9875	0	0	0	0	0	0	103.979	0	0	3.34695	0	0
CHCIB 3950	A. punctatus	57.33	0	0	0	0	0	0	0	0	0	0	0	0	0	0	7	0	0	0	0	0	0	0	2	0	0	0		0	0	0	0	0	0	0	0	0	0	0	0	0	0	37.38	0	0	0	0	0
CHCIB 3951	A. punctatus	51.85	0	0	0	0	1	0	0	0	0	0	0	0	0	0	42	1	0	0	0	0	0	0	0	0	0	0		0	0	0	0	1.18899	0	0	0	0	0	0	0	0	0	411.475	1.05464	0	0	0	0
CHCIB 3953	A. punctatus	58.08	0	0	1	0	0	0	0	0	0	0	0	0	0	0	4	0	0	0	0	0	0	0	0	0	0	0		0	0	18.4951	0	0	0	0	0	0	0	0	0	0	0	59.6736	0	0	0	0	0
CHCIB 3954	A. punctatus	61.02	0	0	0	0	1	0	0	0	0	0	0	0	1	0	24	0	0	63	0	0	0	0	0	0	1	0		0	0	0	0	10.5754	0	0	0	0	0	0	0	1.37156	0	76.1239	0	0	34.0364	0	0
CHCIB 3956	A. punctatus	66.19	0	0	1	0	0	0	0	0	0	0	0	0	0	0	1	0	0	0	0	0	0	0	0	0	0	0		0	0	0.368103	0	0	0	0	0	0	0	0	0	0	0	0.556255	0	0	0	0	0
CHCIB 3958	A. punctatus	55.91	0	0	0	0	1	0	0	0	0	0	0	0	0	0	5	1	0	0	0	0	0	0	0	0	0	0		0	0	0	0	3.31823	0	0	0	0	0	0	0	0	0	20.5995	4.11806	0	0	0	0
CHCIB 3959	A. punctatus	56.1	0	0	0	0	0	0	0	0	0	0	0	0	1	0	0	0	0	0	0	0	0	0	0	0	0	0		0	0	0	0	0	0	0	0	0	0	0	0	0.0389418	0	0	0	0	0	0	0
CHCIB 5475	A. punctatus	59.42	0	0	1	0	4	0	0	0	0	0	0	0	3	0	15	0	0	752	0	0	0	0	0	0	0	0		0	0	9.27519	0	56.0096	0	0	0	0	0	0	0	7.86436	0	69.1118	0	0	323.589	0	0
CHCIB 5476	A. punctatus	53.89	0	0	0	0	0	0	0	0	0	0	0	0	0	0	3	0	0	1	2	0	0	0	0	0	0	0		0	0	0	0	0	0	0	0	0	0	0	0	0	0	4.79153	0	0	0.393302	85.6892	0
XR 0839	A. punctatus	53.14	0	0	0	0	0	0	0	0	0	1	0	0	0	0	29	1	0	0	0	0	0	0	0	0	0	0		0	0	0	0	0	0	0	0	0	3.45135	0	0	0	0	238.011	0.848944	0	0	0	0
XR 0940	A. punctatus	55.67	0	0	1	0	0	0	0	0	0	0	0	0	1	0	166	0	0	673	0	0	0	0	0	0	0	0		0	0	15.3266	0	0	0	0	0	0	0	0	0	0.650846	0	383.311	0	0	1264.3	0	0
XR 0943	A. punctatus	67.96	0	0	0	0	0	0	0	0	0	0	0	0	0	0	15	0	0	221	0	0	0	0	0	0	0	0		0	0	0	0	0	0	0	0	0	0	0	0	0	0	287.046	0	0	112.875	0	0
XR 0945	A. punctatus	49.06	0	0	0	0	0	0	0	0	0	0	0	0	0	0	27	0	0	0	0	0	0	0	0	0	0	0		0	0	0	0	0	0	0	0	0	0	0	0	0	0	142.412	0	0	0	0	0
XR 1026	A. punctatus	56.65	0	0	0	0	0	0	0	0	0	0	0	0	0	0	1	0	0	0	0	0	0	0	0	0	0	0		0	0	0	0	0	0	0	0	0	0	0	0	0	0	1.08627	0	0	0	0	0
XR 1028	A. punctatus	60	0	0	0	0	0	0	0	0	0	0	0	0	0	0	15	0	0	0	0	1	0	0	0	0	0	0		0	0	0	0	0	0	0	0	0	0	0	0	0	0	136.461	0	0	0	0	0.895078
XR 1185	A. punctatus	56.39	0	0	0	0	1	0	0	0	0	0	0	0	0	0	2	0	0	0	0	0	0	0	0	0	0	0		0	0	0	0	22.6909	0	0	0	0	0	0	0	0	0	14.5479	0	0	0	0	0
XR 1186	A. punctatus	57.54	0	0	0	0	0	0	0	0	0	0	0	0	0	0	13	0	0	0	0	0	0	0	0	0	0	0		0	0	0	0	0	0	0	0	0	0	0	0	0	0	14.7704	0	0	0	0	0
XR 1192	A. punctatus	70.3	0	0	0	0	0	0	0	0	0	0	0	0	0	0	51	0	0	0	0	0	0	0	0	0	0	0		0	0	0	0	0	0	0	0	0	0	0	0	0	0	439.187	0	0	0	0	0
XR 1233	A. punctatus	56.77	0	0	0	1	1	0	0	0	0	0	0	0	0	0	25	0	0	0	0	0	0	0	0	0	0	0		0	0	0	3.60188	41.6788	0	0	0	0	0	0	0	0	0	121.24	0	0	0	0	0
XR 1236	A. punctatus	52.98	0	0	0	0	2	0	0	0	0	0	0	0	0	0	5	0	0	0	0	0	0	0	0	0	0	0		0	0	0	0	11.4888	0	0	0	0	0	0	0	0	0	27.8392	0	0	0	0	0
XR 1276	A. punctatus	51.69	0	0	0	0	0	0	0	0	0	0	0	0	0	0	58	0	0	0	0	0	0	0	0	0	0	0		0	0	0	0	0	0	0	0	0	0	0	0	0	0	56.5271	0	0	0	0	0
XR 1288	A. punctatus	54.51	0	0	0	0	3	0	0	0	0	0	0	0	0	1	11	0	0	0	0	1	0	0	0	0	0	0		0	0	0	0	17.4465	0	0	0	0	0	0	0	0	3.29243	2.36881	0	0	0	0	70.8118
CHCIB 3916	A. punctatus	47.8	0	0	0	0	0	0	0	0	0	0	0	0	0	0	9	0	0	3	0	0	0	0	0	0	0	0		0	0	0	0	0	0	0	0	0	0	0	0	0	0	12.1582	0	0	1.33593	0	0
CHCIB 3917	A. punctatus	48.55	0	0	0	0	2	0	0	0	0	0	0	0	0	0	101	0	0	0	0	0	0	0	0	0	0	0		0	0	0	0	23.7511	0	0	0	0	0	0	0	0	0	186.206	0	0	0	0	0
XR 1037	A. punctatus	47.56	0	0	0	0	4	0	0	0	0	0	0	0	0	0	59	0	0	0	0	0	0	0	0	0	0	0		0	0	0	0	66.0051	0	0	0	0	0	0	0	0	0	247.954	0	0	0	0	0
XR 0861	A. punctatus	54.4	0	0	0	0	2	0	0	1	0	0	0	0	1	0	121	0	0	180	0	0	0	0	0	0	0	0		0	0	0	0	53.5364	0	0	1.20752	0	0	0	0	0.618346	0	192.676	0	0	140.505	0	0
CHCIB 3927	A. punctatus	24.36	0	0	0	0	0	0	0	0	0	0	0	0	0	0	245	0	0	0	0	0	0	0	0	0	0	0		0	0	0	0	0	0	0	0	0	0	0	0	0	0	194.804	0	0	0	0	0
CHCIB 3938	A. punctatus	12.99	1	0	0	0	0	0	0	0	0	0	0	0	0	0	2	0	0	0	0	0	0	0	0	0	0	0		0.121533	0	0	0	0	0	0	0	0	0	0	0	0	0	0.375333	0	0	0	0	0
CHCIB 3939	A. punctatus	24.48	0	0	0	0	0	0	0	0	0	0	0	0	0	0	41	0	0	0	0	0	0	0	0	0	0	0		0	0	0	0	0	0	0	0	0	0	0	0	0	0	26.0969	0	0	0	0	0
CHCIB 3940	A. punctatus	28.75	0	0	0	0	0	0	0	0	0	0	0	0	0	0	7	0	0	0	0	1	0	0	0	0	0	0		0	0	0	0	0	0	0	0	0	0	0	0	0	0	18.4522	0	0	0	0	0.118222
CHCIB 3941	A. punctatus	22.45	2	0	0	0	2	0	0	0	0	1	0	0	0	8	9	0	0	87	0	1	0	0	0	0	0	0		0.823466	0	0	0	1.5083	0	0	0	0	4.15	0	0	0	5.26482	5.88234	0	0	218.993	0	3.68895
CHCIB 3942	A. punctatus	24.36	0	0	1	0	0	0	0	0	0	0	0	0	0	0	29	0	0	0	0	0	0	0	1	0	0	0		0	0	0.222358	0	0	0	0	0	0	0	0	0	0	0	35.6754	0	0	0	0	0
CHCIB 3943	A. punctatus	17.52	0	0	0	0	2	0	0	0	0	0	0	0	0	0	0	0	0	4	0	0	0	0	0	0	0	0		0	0	0	0	1.97468	0	0	0	0	0	0	0	0	0	0	0	0	1.79818	0	0
CHCIB 3944	A. punctatus	17.11	0	0	0	0	0	0	0	0	0	0	0	0	0	0	1	0	0	0	0	0	0	0	0	0	0	0		0	0	0	0	0	0	0	0	0	0	0	0	0	0	0.0239478	0	0	0	0	0
CHCIB 3945	A. punctatus	31.44	0	0	0	0	9	0	17	0	0	19	0	0	0	2	18	0	0	0	5	2	0	0	0	0	0	0		0	0	0	0	23.8455	0	1.27006	0	0	25.3179	0	0	0	0.721162	29.2501	0	0	0	55.456	9.02323
CHCIB 3946	A. punctatus	26.96	0	0	1	0	4	0	9	0	0	8	0	0	0	9	3	0	0	0	0	1	0	0	0	0	0	0		0	0	0.224051	0	94.8855	0	1.79676	0	0	22.2995	0	0	0	8.23442	1.0158	0	0	0	0	0.524041
CHCIB 3947	A. punctatus	29.1	0	0	0	0	2	0	354	0	0	1	0	0	1	1	3	0	0	0	0	0	0	0	0	0	0	0		0	0	0	0	2.51526	0	88.7054	0	0	3.73095	0	0	0.789326	1.45667	2.43596	0	0	0	0	0
CHCIB 3948	A. punctatus	28.52	0	0	1	0	15	0	27	0	0	6	0	0	2	0	27	0	0	0	0	0	0	0	0	0	0	0		0	0	0.0617497	0	11.7125	0	5.17273	0	0	6.34627	0	0	2.73909	0	19.0301	0	0	0	0	0
CHCIB 3949	A. punctatus	42.61	0	0	0	0	1	0	0	0	0	0	0	0	0	0	2	0	0	0	0	0	0	0	0	0	0	0		0	0	0	0	49.5261	0	0	0	0	0	0	0	0	0	0.478768	0	0	0	0	0
CHCIB 3952	A. punctatus	32.1	0	0	0	0	0	0	0	0	0	0	0	0	0	0	173	0	0	0	0	0	0	0	0	0	0	0		0	0	0	0	0	0	0	0	0	0	0	0	0	0	321.104	0	0	0	0	0
CHCIB 3955	A. punctatus	33.38	0	0	0	0	0	0	0	0	0	0	0	0	0	0	2	0	0	45	0	0	0	0	0	0	0	0		0	0	0	0	0	0	0	0	0	0	0	0	0	0	0.374042	0	0	264.654	0	0
XR 0770	A. punctatus	22.47	1	0	3	0	8	0	2	0	0	0	0	0	2	1	2	2	0	0	0	3	0	0	0	0	0	0		0.117438	0	0.689639	0	17.6888	0	0.237539	0	0	0	0	0	2.9019	1.42005	2.01993	1.57791	0	0	0	23.171
XR 0771	A. punctatus	20.36	1	0	0	0	3	0	0	0	0	2	0	0	1	0	34	0	0	0	0	1	0	0	0	0	0	0		0.10937	0	0	0	2.21248	0	0	0	0	0.135499	0	0	1.14747	0	39.1881	0	0	0	0	29.1798
XR 0772	A. punctatus	22.91	0	0	1	0	5	0	0	0	0	0	0	0	0	0	30	0	0	0	0	1	0	0	0	0	0	0		0	0	0.0942456	0	10.31	0	0	0	0	0	0	0	0	0	15.475	0	0	0	0	0.079847
XR 0828	A. punctatus	38.93	0	0	0	0	0	0	0	0	0	0	0	0	0	0	34	0	0	0	0	0	0	0	0	0	0	0		0	0	0	0	0	0	0	0	0	0	0	0	0	0	39.4948	0	0	0	0	0
XR 0829	A. punctatus	30.09	0	0	0	0	7	0	0	0	0	1	0	0	0	0	0	0	0	0	0	0	0	0	0	0	0	0		0	0	0	0	16.4968	0	0	0	0	0.443641	0	0	0	0	0	0	0	0	0	0
XR 0830	A. punctatus	40.09	0	0	2	0	6	0	0	0	0	1	0	0	0	0	0	0	0	0	0	0	0	0	0	0	0	0		0	0	0.677942	0	19.4548	0	0	0	0	0.136694	0	0	0	0	0	0	0	0	0	0
XR 0831	A. punctatus	37.75	0	0	0	0	2	0	0	0	0	0	0	0	0	0	30	0	0	0	0	0	0	0	0	0	0	0		0	0	0	0	1.89771	0	0	0	0	0	0	0	0	0	33.1331	0	0	0	0	0
XR 0832	A. punctatus	34.24	0	0	1	0	5	0	0	0	0	0	0	0	0	0	2	0	0	0	0	0	0	0	0	0	0	0		0	0	1.63427	0	7.33144	0	0	0	0	0	0	0	0	0	1.07885	0	0	0	0	0
XR 0833	A. punctatus	42.36	0	0	0	0	0	0	0	0	0	0	0	0	0	0	50	0	0	0	0	0	0	0	0	0	0	0		0	0	0	0	0	0	0	0	0	0	0	0	0	0	43.4605	0	0	0	0	0
XR 0834	A. punctatus	32.87	0	0	0	0	3	0	0	0	0	1	0	0	0	0	0	0	0	0	0	0	0	0	0	0	0	0		0	0	0	0	1.90014	0	0	0	0	0	0	0	0	0	0	0	0	0	0	0
XR 0835	A. punctatus	26.34	0	0	0	0	0	0	0	0	0	0	0	0	0	0	1	0	0	0	0	0	0	0	0	0	0	0		0	0	0	0	0	0	0	0	0	0	0	0	0	0	0.291533	0	0	0	0	0
XR 0838	A. punctatus	26.86	0	0	0	0	8	0	0	0	0	1	0	0	0	0	0	0	0	0	0	0	0	0	0	0	0	0		0	0	0	0	14.3376	0	0	0	0	0.683615	0	0	0	0	0	0	0	0	0	0
XR 0944	A. punctatus	32.96	0	0	0	0	0	0	0	0	0	0	0	0	0	0	5	0	0	0	0	0	0	0	0	0	0	0		0	0	0	0	0	0	0	0	0	0	0	0	0	0	61.0744	0	0	0	0	0
XR 0092	D. eximius	33.69	0	0	0	0	0	0	0	0	0	0	0	0	0	0	1	0	0	0	0	0	0	0	0	0	0	0		0	0	0	0	0	0	0	0	0	0	0	0	0	0	0.968426	0	0	0	0	0
XR 0093	D. eximius	29.14	0	0	0	0	2	0	0	0	0	0	0	0	0	0	6	0	0	0	0	0	0	0	0	0	0	0		0	0	0	0	37.5117	0	0	0	0	0	0	0	0	0	2.96413	0	0	0	0	0
XR 0119	D. eximius	30.31	0	0	0	0	1	0	0	0	0	1	0	0	1	0	0	0	0	0	0	0	0	0	0	0	0	0		0	0	0	0	1.46953	0	0	0	0	0.282419	0	0	0.72767	0	0	0	0	0	0	0
XR 0168	D. eximius	32.61	0	0	1	0	0	0	0	0	0	0	0	0	0	0	10	1	0	0	0	2	0	0	0	0	0	0		0	0	1.10107	0	0	0	0	0	0	0	0	0	0	0	39.8071	125.56	0	0	0	3.53197
XR 0309	D. eximius	25.01	0	0	0	0	0	0	0	0	0	1	0	0	0	0	3	0	0	0	0	0	0	0	0	0	0	0		0	0	0	0	0	0	0	0	0	0.124981	0	0	0	0	1.07303	0	0	0	0	0
XR 0319	D. eximius	32.17	0	0	0	0	4	0	0	0	0	3	0	0	1	0	4	0	0	0	0	0	0	0	0	0	0	0		0	0	0	0	6.00708	0	0	0	0	2.15232	0	0	2.77339	0	20.2349	0	0	0	0	0
XR 0326	D. eximius	28.82	0	0	0	0	1	0	0	0	0	0	0	0	0	0	0	0	0	0	0	0	0	0	0	0	0	0		0	0	0	0	14.1342	0	0	0	0	0	0	0	0	0	0	0	0	0	0	0
XR 0329	D. eximius	30.16	0	0	0	0	1	0	0	0	0	0	0	0	0	0	0	0	0	0	0	0	0	0	0	0	0	0		0	0	0	0	0.593366	0	0	0	0	0	0	0	0	0	0	0	0	0	0	0
XR 0331	D. eximius	31.68	0	0	0	0	2	0	0	0	0	1	0	0	0	0	0	0	0	0	0	1	0	0	0	0	0	0		0	0	0	0	1.34899	0	0	0	0	0.00760248	0	0	0	0	0	0	0	0	0	4.46106
XR 0355	D. eximius	32.76	0	0	0	0	1	0	0	0	0	0	0	0	0	0	0	0	0	0	0	0	0	0	0	0	0	0		0	0	0	0	15.5594	0	0	0	0	0	0	0	0	0	0	0	0	0	0	0
XR 0399	D. eximius	31.37	0	0	0	0	4	0	0	0	0	0	0	0	1	0	0	0	0	0	0	0	0	0	0	0	0	0		0	0	0	0	111.778	0	0	0	0	0	0	0	89.6131	0	0	0	0	0	0	0
XR 0450	D. eximius	26.04	0	0	2	0	0	0	0	0	0	6	0	0	0	0	0	0	0	0	0	0	0	0	0	0	0	0		0	0	0.470076	0	0	0	0	0	0	15.2045	0	0	0	0	0	0	0	0	0	0
XR 0558	D. eximius	26.32	0	0	0	0	0	0	0	0	0	0	0	0	0	0	1	0	0	0	0	0	0	0	0	0	0	0		0	0	0	0	0	0	0	0	0	0	0	0	0	0	0.701362	0	0	0	0	0
XR 0956	D. eximius	28.51	0	0	0	0	0	0	0	0	0	0	0	0	1	0	4	0	0	0	0	0	0	0	0	0	0	0		0	0	0	0	0	0	0	0	0	0	0	0	16.5404	0	1.83228	0	0	0	0	0
XR 0957	D. eximius	26.74	0	0	0	0	6	0	0	0	0	0	0	0	0	0	0	1	0	0	0	0	0	0	0	0	0	0		0	0	0	0	25.1993	0	0	0	0	0	0	0	0	0	0	0.158842	0	0	0	0
XR 0959	D. eximius	29.83	0	0	0	0	6	0	0	0	0	0	0	0	1	0	0	0	0	0	1	0	0	0	0	0	0	0		0	0	0	0	16.9429	0	0	0	0	0	0	0	4.4597	0	0	0	0	0	1.03906	0
XR 0960	D. eximius	27.44	0	0	0	0	0	0	0	0	0	0	0	0	1	0	0	0	0	0	0	0	0	0	1	0	0	0		0	0	0	0	0	0	0	0	0	0	0	0	5.26569	0	0	0	0	0	0	0
XR 0961	D. eximius	28.19	0	0	0	0	2	0	0	0	0	0	0	0	0	0	7	0	0	0	0	0	0	0	0	0	0	0		0	0	0	0	36.4697	0	0	0	0	0	0	0	0	0	4.10517	0	0	0	0	0
XR 0964	D. eximius	29.72	0	0	0	0	7	0	0	0	0	0	0	0	0	0	2	0	0	0	1	0	0	0	0	0	0	0		0	0	0	0	21.4153	0	0	0	0	0	0	0	0	0	1.18159	0	0	0	9.55651	0
XR 0965	D. eximius	27.95	0	0	0	0	6	0	0	0	0	0	0	0	1	1	4	0	0	0	0	0	0	0	0	0	0	0		0	0	0	0	32.5077	0	0	0	0	0	0	0	76.6594	1.22696	2.25558	0	0	0	0	0
XR 0966	D. eximius	24.09	0	0	1	0	2	0	0	0	0	0	0	0	0	0	3	0	0	0	0	0	0	0	0	0	0	0		0	0	30.2624	0	7.30948	0	0	0	0	0	0	0	0	0	2.21058	0	0	0	0	0
XR 0967	D. eximius	27.11	0	0	0	0	4	0	0	0	0	0	0	0	0	0	0	1	0	0	0	0	0	0	0	0	0	0		0	0	0	0	35.496	0	0	0	0	0	0	0	0	0	0	60.9221	0	0	0	0
XR 0423	D. eximius	15.45	0	0	0	0	0	0	1	0	0	2	0	0	0	0	0	0	0	0	0	0	0	0	0	0	0	0		0	0	0	0	0	0	0.0189339	0	0	0.135278	0	0	0	0	0	0	0	0	0	0
XR 0424	D. eximius	18.58	0	0	3	0	5	1	1	0	0	5	0	0	0	0	0	0	0	0	0	0	0	0	0	0	0	0		0	0	1.27809	0	4.32317	1.86907	0.0229017	0	0	2.47625	0	0	0	0	0	0	0	0	0	0
XR 0425	D. eximius	17.9	0	0	1	0	0	1	0	0	0	2	0	0	0	1	6	0	0	0	0	0	0	0	0	0	0	0		0	0	0.628474	0	0	0.21111	0	0	0	1.22741	0	0	0	2.31411	4.2716	0	0	0	0	0
XR 0426	D. eximius	16.93	0	0	2	0	2	0	1	0	0	1	1	0	0	0	0	0	0	0	0	0	0	0	0	0	0	0		0	0	0.732284	0	1.89175	0	0.012286	0	0	0.249374	2.54463	0	0	0	0	0	0	0	0	0
XR 0428	D. eximius	16.64	0	0	0	0	1	0	0	0	0	1	0	0	0	2	5	1	0	0	0	0	0	0	2	0	0	0		0	0	0	0	0.0766851	0	0	0	0	0.129352	0	0	0	4.25001	3.20416	0.809544	0	0	0	0
XR 0429	D. eximius	16.5	0	0	0	0	1	0	1	0	0	2	0	0	0	1	0	0	0	0	0	0	0	0	0	0	0	0		0	0	0	0	0.679775	0	0.0199047	0	0	0.377083	0	0	0	1.77507	0	0	0	0	0	0
XR 0430	D. eximius	18.37	0	0	7	0	0	0	0	0	0	3	0	0	1	0	4	1	0	0	0	0	0	0	0	0	0	0		0	0	4.83629	0	0	0	0	0	0	0.890563	0	0	2.49781	0	3.7317	1.66444	0	0	0	0
XR 0449	D. eximius	19.08	0	0	1	0	1	0	0	0	0	2	0	0	0	1	0	0	0	0	0	0	0	0	0	0	0	0		0	0	0.592181	0	0.285682	0	0	0	0	2.84288	0	0	0	0.553039	0	0	0	0	0	0
XR 0455	D. eximius	21.5	0	0	0	0	0	0	0	0	0	2	0	0	0	0	1	0	0	0	0	0	0	0	0	0	0	0		0	0	0	0	0	0	0	0	0	0.477999	0	0	0	0	0.157076	0	0	0	0	0
XR 047	D. eximius	24.89	0	0	0	0	2	0	0	0	0	1	0	0	0	1	2	0	0	0	0	0	0	0	0	0	0	0		0	0	0	0	33.3966	0	0	0	0	0.0516969	0	0	0	2.62079	0.703393	0	0	0	0	0
CHCIB 3960	I. nebulifer	70.38	0	0	0	0	1	0	0	0	0	0	0	0	1	0	3	0	0	0	0	0	0	0	0	0	0	0		0	0	0	0	8.08693	0	0	0	0	0	0	0	4.22234	0	0.325726	0	0	0	0	0
CHCIB 3967	I. nebulifer	71.6	0	0	1	0	7	0	0	0	0	0	0	0	0	0	18	0	0	0	0	0	0	0	0	0	0	0		0	0	0.371423	0	390.096	0	0	0	0	0	0	0	0	0	48.604	0	0	0	0	0
CHCIB 3968	I. nebulifer	72	0	0	0	0	1	0	0	0	0	0	0	0	1	0	0	0	0	0	0	0	2	0	2	0	0	0		0	0	0	0	68.8308	0	0	0	0	0	0	0	3.36825	0	0	0	0	0	0	0
CHCIB 3969	I. nebulifer	64.32	0	0	0	0	2	0	0	0	0	1	0	0	2	0	21	1	0	0	0	0	0	0	1	0	0	0		0	0	0	0	11.1542	0	0	0	0	0.388857	0	0	9.80568	0	54.485	42.6693	0	0	0	0
CHCIB 3970	I. nebulifer	72.34	0	0	1	0	3	0	0	0	0	0	0	0	0	0	2	0	0	0	0	0	0	0	0	0	0	0		0	0	2.92964	0	931.252	0	0	0	0	0	0	0	0	0	1.42528	0	0	0	0	0
CHCIB 3971	I. nebulifer	67.87	0	0	0	0	0	0	0	0	0	0	0	0	0	0	9	0	0	0	0	0	0	0	0	0	0	0		0	0	0	0	0	0	0	0	0	0	0	0	0	0	51.9861	0	0	0	0	0
CHCIB 3972	I. nebulifer	70.6	0	0	1	0	2	0	0	0	0	0	0	0	0	0	4	0	0	0	0	0	0	0	0	0	0	0		0	0	0.417998	0	144.71	0	0	0	0	0	0	0	0	0	13.7155	0	0	0	0	0
CHCIB 3973	I. nebulifer	69.04	0	0	0	0	9	0	0	0	0	0	0	0	0	0	5	0	0	0	0	0	0	0	2	0	0	0		0	0	0	0	121.629	0	0	0	0	0	0	0	0	0	11.3106	0	0	0	0	0
CHCIB 3974	I. nebulifer	79.11	0	0	0	0	2	0	0	0	0	0	0	0	0	0	2	0	0	0	0	0	0	0	1	0	0	0		0	0	0	0	182.34	0	0	0	0	0	0	0	0	0	4.75063	0	0	0	0	0
CHCIB 3976	I. nebulifer	67.34	0	0	0	0	5	0	0	0	0	0	0	0	14	0	2	0	0	0	0	0	0	0	1	0	0	0		0	0	0	0	827.567	0	0	0	0	0	0	0	20.9532	0	0.208684	0	0	0	0	0
CHCIB 3962	I. nebulifer	68.47	0	0	0	0	2	0	0	0	0	0	0	0	1	0	5	0	0	0	0	0	0	0	0	0	0	0		0	0	0	0	15.8791	0	0	0	0	0	0	0	1.34761	0	4.61196	0	0	0	0	0
CHCIB 3963	I. nebulifer	64.15	0	0	0	0	0	0	0	0	0	0	0	0	0	0	15	0	0	0	0	0	0	0	1	0	0	0		0	0	0	0	0	0	0	0	0	0	0	0	0	0	11.1964	0	0	0	0	0
CHCIB 3964	I. nebulifer	71.35	0	0	0	0	0	0	0	0	1	0	0	0	0	0	2	0	0	0	0	0	0	0	0	0	0	0		0	0	0	0	0	0	0	0	34.9481	0	0	0	0	0	2.69693	0	0	0	0	0
CHCIB 3965	I. nebulifer	63.54	0	0	0	0	0	0	0	0	0	0	0	0	1	0	0	0	0	0	0	0	0	0	0	0	0	0		0	0	0	0	0	0	0	0	0	0	0	0	2.35782	0	0	0	0	0	0	0
CHCIB 3966	I. nebulifer	54.83	0	0	0	0	6	0	0	0	0	0	0	0	2	0	27	0	0	0	0	0	0	0	0	0	0	0		0	0	0	0	233.411	0	0	0	0	0	0	0	12.9032	0	216.713	0	0	0	0	0
CHCIB 3981	I. nebulifer	66.29	0	0	1	0	4	0	0	0	0	0	0	0	0	0	0	0	0	0	0	0	0	0	1	0	0	0		0	0	6.08199	0	352.652	0	0	0	0	0	0	0	0	0	0	0	0	0	0	0
CHCIB 3033	I. nebulifer	65.9	0	0	0	0	3	0	0	0	0	0	0	0	0	0	0	0	0	0	0	0	0	0	0	0	0	0		0	0	0	0	126.704	0	0	0	0	0	0	0	0	0	0	0	0	0	0	0
CHCIB 3036	I. nebulifer	83.13	0	0	0	0	12	0	0	0	0	0	0	0	0	0	4	0	0	20	1	0	0	0	1	0	0	0		0	0	0	0	7100.88	0	0	0	0	0	0	0	0	0	59.8491	0	0	12.2519	7.6925	0
CHCIB 3035	I. nebulifer	85.83	0	0	0	0	3	0	0	0	0	0	0	0	0	0	1	0	0	0	0	0	0	0	1	0	0	0		0	0	0	0	21.4542	0	0	0	0	0	0	0	0	0	10.1483	0	0	0	0	0
CHCIB 3034	I. nebulifer	76.61	0	0	0	0	0	0	0	0	0	0	0	0	0	0	5	0	0	0	0	0	0	0	0	0	0	0		0	0	0	0	0	0	0	0	0	0	0	0	0	0	2.31212	0	0	0	0	0
CHCIB 3041	L. berlandieri	67.18	0	0	1	0	0	0	0	0	0	0	0	0	0	0	1	1	1	0	1	0	0	0	2	0	0	0		0	0	5.32552	0	0	0	0	0	0	0	0	0	0	0	11.3407	21.9296	150.055	0	30.9152	0
CHCIB 3042	L. berlandieri	60.63	0	0	0	0	0	1	0	0	0	0	0	0	0	0	0	0	1	0	1	0	0	0	0	0	0	0		0	0	0	0	0	3.79844	0	0	0	0	0	0	0	0	0	0	187.194	0	5.42197	0
CHCIB 3043	L. berlandieri	58.18	0	0	0	0	0	0	0	0	0	0	0	0	0	0	0	2	0	0	0	0	0	0	0	0	0	0		0	0	0	0	0	0	0	0	0	0	0	0	0	0	0	147.564	0	0	0	0
CHCIB 3044	L. berlandieri	64.88	0	0	1	0	2	0	0	0	0	0	0	0	0	0	2	3	0	0	0	0	0	0	0	0	0	0		0	0	950.487	0	126.037	0	0	0	0	0	0	0	0	0	1.93685	178.099	0	0	0	0
CHCIB 3045	L. berlandieri	51.52	0	0	2	0	0	0	0	0	0	0	0	0	0	0	0	0	0	0	0	0	0	0	2	0	0	0		0	0	9.78491	0	0	0	0	0	0	0	0	0	0	0	0	0	0	0	0	0
CHCIB 3046	L. berlandieri	55.61	0	0	0	0	1	0	0	0	0	1	0	0	0	0	1	1	0	0	0	0	0	0	1	0	0	0		0	0	0	0	2.51271	0	0	0	0	3.65966	0	0	0	0	4.89478	39.2891	0	0	0	0
CHCIB 3075	L. berlandieri	54.1	0	0	0	0	0	0	0	0	0	0	0	0	0	0	0	0	0	0	1	0	0	0	0	0	0	0		0	0	0	0	0	0	0	0	0	0	0	0	0	0	0	0	0	0	9.05827	0
CHCIB 3076	L. berlandieri	56.92	0	0	0	0	1	0	0	0	0	0	0	0	0	0	0	0	0	0	0	0	0	0	0	0	0	0		0	0	0	0	8.07161	0	0	0	0	0	0	0	0	0	0	0	0	0	0	0
CHCIB 3078	L. berlandieri	54.85	0	0	0	0	0	0	0	0	0	0	0	0	1	0	0	0	0	0	1	0	0	0	0	0	0	0		0	0	0	0	0	0	0	0	0	0	0	0	3.29265	0	0	0	0	0	6.46918	0
CHCIB 3079	L. berlandieri	56.29	0	0	0	0	1	0	0	0	0	0	0	0	0	0	0	0	0	0	0	0	0	0	0	0	0	0		0	0	0	0	2.01239	0	0	0	0	0	0	0	0	0	0	0	0	0	0	0
CHCIB 3080	L. berlandieri	60.17	0	0	0	0	0	0	0	0	0	0	0	0	0	0	0	0	0	0	1	0	0	0	0	0	0	0		0	0	0	0	0	0	0	0	0	0	0	0	0	0	0	0	0	0	6.58565	0
CHCIB 3081	L. berlandieri	58.8	0	0	0	0	0	0	0	0	0	0	0	0	0	0	0	0	0	0	1	0	0	0	0	0	0	0		0	0	0	0	0	0	0	0	0	0	0	0	0	0	0	0	0	0	12.523	0
CHCIB 3082	L. berlandieri	63.23	0	0	0	0	1	0	0	0	0	0	0	0	1	0	0	1	0	0	1	0	0	0	0	0	0	0		0	0	0	0	5.96241	0	0	0	0	0	0	0	1132.33	0	0	27.3248	0	0	31.3548	0
CHCIB 3086	L. berlandieri	59.66	0	0	0	0	1	0	0	0	0	1	0	0	0	0	0	0	0	0	0	0	0	0	1	0	0	0		0	0	0	0	49.6675	0	0	0	0	0.460003	0	0	0	0	0	0	0	0	0	0
CHCIB 3089	L. berlandieri	57.87	0	0	0	0	0	0	0	0	0	1	0	0	0	0	0	0	0	0	0	0	0	0	0	0	0	0		0	0	0	0	0	0	0	0	0	0.766062	0	0	0	0	0	0	0	0	0	0
CHCIB 3091	L. berlandieri	60.02	0	0	0	0	0	0	0	0	0	0	0	0	0	0	0	0	0	0	0	0	0	0	1	0	0	0		0	0	0	0	0	0	0	0	0	0	0	0	0	0	0	0	0	0	0	0
CHCIB 3092	L. berlandieri	71.03	0	0	0	0	1	0	0	0	0	0	0	0	0	0	0	1	0	0	0	0	0	0	2	0	0	0		0	0	0	0	66.2328	0	0	0	0	0	0	0	0	0	0	13.1645	0	0	0	0
CHCIB 3093	L. berlandieri	80.49	0	0	0	0	0	0	0	0	0	0	0	0	0	0	0	0	0	0	1	4	0	0	1	0	0	0		0	0	0	0	0	0	0	0	0	0	0	0	0	0	0	0	0	0	27.5643	146.522
CHCIB 3094	L. berlandieri	59.75	0	0	0	0	0	0	0	0	0	1	0	0	0	0	0	0	0	0	3	0	0	0	0	0	0	0		0	0	0	0	0	0	0	0	0	50.4466	0	0	0	0	0	0	0	0	105.76	0
CHCIB 3095	L. berlandieri	66.03	0	0	0	0	0	0	0	0	0	0	0	0	0	0	0	2	0	0	4	0	0	0	0	0	0	0		0	0	0	0	0	0	0	0	0	0	0	0	0	0	0	185.393	0	0	301.791	0
CHCIB 3096	L. berlandieri	69.06	0	0	0	0	0	0	0	0	0	0	0	0	0	0	0	0	0	0	1	0	0	0	0	0	0	0		0	0	0	0	0	0	0	0	0	0	0	0	0	0	0	0	0	0	72.7364	0
CHCIB 3097	L. berlandieri	75.17	0	0	1	0	3	0	0	0	0	0	0	0	0	0	0	0	0	0	2	0	0	0	0	0	0	0		0	0	508.932	0	38.2919	0	0	0	0	0	0	0	0	0	0	0	0	0	234.739	0
CHCIB 3098	L. berlandieri	78.64	0	0	0	0	0	0	0	0	0	0	0	0	0	0	1	0	0	0	1	0	0	0	0	0	0	0		0	0	0	0	0	0	0	0	0	0	0	0	0	0	7.27454	0	0	0	1.1341	0
CHCIB 3099	L. berlandieri	75.86	0	0	0	1	0	0	0	0	0	0	0	0	0	0	0	0	0	0	1	0	0	0	0	0	0	0		0	0	0	6.03613	0	0	0	0	0	0	0	0	0	0	0	0	0	0	40.5497	0
CHCIB 3100	L. berlandieri	76.21	0	0	0	0	0	0	0	0	0	0	0	0	0	0	1	0	0	0	1	0	0	0	0	0	0	0		0	0	0	0	0	0	0	0	0	0	0	0	0	0	0.321692	0	0	0	148.984	0
CHCIB 3101	L. berlandieri	65.89	0	0	0	0	0	0	0	0	0	0	0	0	0	0	0	0	0	0	1	0	0	0	0	0	0	0		0	0	0	0	0	0	0	0	0	0	0	0	0	0	0	0	0	0	157.554	0
CHCIB 3083	L. berlandieri	70.97	0	0	0	0	0	0	0	0	0	0	0	0	0	0	0	0	0	0	1	0	0	0	0	0	0	0		0	0	0	0	0	0	0	0	0	0	0	0	0	0	0	0	0	0	4.61804	0
CHCIB 3029	L. berlandieri	84.41	0	0	0	0	2	0	0	0	0	0	0	0	0	0	0	0	0	0	1	0	0	0	3	0	0	0		0	0	0	0	8.98347	0	0	0	0	0	0	0	0	0	0	0	0	0	6.33712	0
CHCIB 3047	L. berlandieri	55.69	0	0	1	0	1	0	0	0	0	0	0	0	0	0	0	0	0	0	0	0	0	0	0	0	0	0		0	0	1.85299	0	10.522	0	0	0	0	0	0	0	0	0	0	0	0	0	0	0
CHCIB 3048	L. berlandieri	59.2	0	0	1	0	4	0	0	0	0	0	0	0	0	0	0	0	0	0	1	0	0	0	0	0	0	0		0	0	9.66269	0	618.763	0	0	0	0	0	0	0	0	0	0	0	0	0	70.2752	0
CHCIB 3049	L. berlandieri	56.09	0	0	0	0	1	0	0	0	0	0	0	0	0	0	0	0	0	0	1	0	0	0	0	0	0	0		0	0	0	0	487.251	0	0	0	0	0	0	0	0	0	0	0	0	0	23.516	0
CHCIB 3050	L. berlandieri	64.8	0	0	0	0	1	0	0	0	0	2	0	0	0	0	4	1	0	0	0	0	0	0	0	0	0	0		0	0	0	0	23.1301	0	0	0	0	0.990053	0	0	0	0	12.1898	83.9086	0	0	0	0
CHCIB 3051	L. berlandieri	59.85	0	0	0	0	5	0	0	0	0	2	0	0	0	0	0	0	0	0	2	0	0	0	0	0	0	0		0	0	0	0	160.509	0	0	0	0	3.52808	0	0	0	0	0	0	0	0	71.9734	0
CHCIB 3052	L. berlandieri	62.16	0	0	0	0	2	0	0	0	0	0	0	0	0	0	0	0	0	0	2	0	0	0	0	0	0	0		0	0	0	0	72.64	0	0	0	0	0	0	0	0	0	0	0	0	0	129.546	0
CHCIB 3054	L. berlandieri	53.62	0	0	1	0	1	0	0	0	0	0	0	0	0	0	1	0	0	0	1	0	0	0	0	0	0	0		0	0	142.022	0	9.62702	0	0	0	0	0	0	0	0	0	1.45034	0	0	0	2.03158	0
CHCIB 3056	L. berlandieri	57.76	0	0	0	0	2	0	0	0	0	0	0	0	0	0	0	1	0	0	0	0	0	0	0	0	0	0		0	0	0	0	161.323	0	0	0	0	0	0	0	0	0	0	28.6807	0	0	0	0
CHCIB 3057	L. berlandieri	59.13	0	0	0	0	1	0	0	0	0	0	0	0	0	0	0	0	0	0	2	0	0	0	0	0	0	0		0	0	0	0	8.95268	0	0	0	0	0	0	0	0	0	0	0	0	0	66.9236	0
CHCIB 3058	L. berlandieri	54.51	0	0	0	0	0	7	0	0	0	0	0	0	0	0	0	0	0	0	1	0	0	0	0	0	0	0		0	0	0	0	0	18.0303	0	0	0	0	0	0	0	0	0	0	0	0	28.1101	0
CHCIB 3061	L. berlandieri	55.44	0	0	1	0	1	0	0	0	0	0	0	0	0	0	0	0	0	0	1	0	0	0	0	0	0	0		0	0	0.144134	0	116.208	0	0	0	0	0	0	0	0	0	0	0	0	0	1.00684	0
CHCIB 3062	L. berlandieri	52.04	0	0	0	0	2	0	0	0	0	0	0	0	0	0	0	0	0	0	0	0	0	0	1	0	0	0		0	0	0	0	124.594	0	0	0	0	0	0	0	0	0	0	0	0	0	0	0
CHCIB 2996	L. berlandieri	51	0	0	1	0	2	0	0	0	0	0	0	0	1	0	0	0	0	0	1	0	0	0	0	0	0	0		0	0	2.33354	0	30.9478	0	0	0	0	0	0	0	8.56263	0	0	0	0	0	1.2442	0
CHCIB 3063	L. berlandieri	62.22	0	0	0	0	1	2	0	0	0	0	0	0	0	0	1	0	0	0	1	0	0	0	0	0	0	0		0	0	0	0	2.41541	118.783	0	0	0	0	0	0	0	0	12.6274	0	0	0	104.687	0
CHCIB 3064	L. berlandieri	69.68	0	0	0	0	3	2	0	0	0	0	0	0	1	0	3	2	0	0	8	0	0	0	0	0	0	0		0	0	0	0	63.0305	14.1202	0	0	0	0	0	0	137.146	0	63.0868	9.11949	0	0	1294.69	0
CHCIB 3065	L. berlandieri	59.66	0	0	1	0	0	0	0	0	0	0	0	0	0	0	1	0	0	0	1	1	0	0	0	0	0	0		0	0	2.64867	0	0	0	0	0	0	0	0	0	0	0	17.1702	0	0	0	178.379	171.709
CHCIB 3066	L. berlandieri	68.57	0	0	0	0	2	0	0	0	0	0	0	0	0	0	1	1	0	0	0	0	0	0	1	0	0	0		0	0	0	0	257.746	0	0	0	0	0	0	0	0	0	14.2779	7.88599	0	0	0	0
CHCIB 3067	L. berlandieri	57.56	0	0	0	0	1	0	0	0	0	0	0	0	0	1	1	0	0	0	0	1	0	0	0	0	0	0		0	0	0	0	18.4199	0	0	0	0	0	0	0	0	19.9174	4.64435	0	0	0	0	24.9242
CHCIB 3005	L. berlandieri	53.56	0	0	0	0	0	0	0	0	0	0	0	0	0	0	0	0	0	0	0	1	0	0	2	0	0	0		0	0	0	0	0	0	0	0	0	0	0	0	0	0	0	0	0	0	0	13.8858
CHCIB 3006	L. berlandieri	65.68	0	0	1	0	0	0	0	0	0	0	0	0	1	0	0	0	0	0	1	3	0	0	2	0	0	0		0	0	6.95318	0	0	0	0	0	0	0	0	0	6.77381	0	0	0	0	0	7.49898	214.555
CHCIB 3007	L. berlandieri	68.71	0	0	0	0	0	0	0	0	0	0	0	0	0	0	1	0	1	0	2	2	0	0	0	0	0	0		0	0	0	0	0	0	0	0	0	0	0	0	0	0	0.0147777	0	68.1199	0	266.944	221.264
CHCIB 3008	L. berlandieri	57.94	0	0	0	0	0	1	0	0	0	0	0	0	0	0	0	0	0	0	0	0	0	0	0	0	0	0		0	0	0	0	0	0.815489	0	0	0	0	0	0	0	0	0	0	0	0	0	0
CHCIB 3009	L. berlandieri	61.9	0	0	0	0	1	0	0	0	0	1	0	0	0	0	0	0	0	0	2	0	0	0	1	0	0	0		0	0	0	0	4.85471	0	0	0	0	22.7855	0	0	0	0	0	0	0	0	217.992	0
CHCIB 3010	L. berlandieri	51.34	0	0	0	0	0	0	0	0	0	0	0	0	0	0	1	1	0	0	0	0	0	0	0	0	0	0		0	0	0	0	0	0	0	0	0	0	0	0	0	0	0.236905	44.2406	0	0	0	0
CHCIB 3011	L. berlandieri	63.24	0	0	0	0	0	1	0	0	0	0	0	0	0	0	1	1	0	0	1	0	0	0	1	0	0	0		0	0	0	0	0	2.86842	0	0	0	0	0	0	0	0	44.7616	66.1968	0	0	83.5407	0
CHCIB 3012	L. berlandieri	51.9	0	0	0	0	1	0	0	0	0	0	0	0	1	0	0	0	0	0	1	0	0	0	1	0	0	0		0	0	0	0	23.698	0	0	0	0	0	0	0	47.5762	0	0	0	0	0	113.098	0
CHCIB 3016	L. berlandieri	64.55	0	0	0	0	0	0	0	0	0	5	0	0	0	0	0	0	0	0	1	0	0	0	0	0	0	0		0	0	0	0	0	0	0	0	0	5.64808	0	0	0	0	0	0	0	0	166.697	0
CHCIB 3017	L. berlandieri	55.44	0	0	0	0	4	1	0	0	0	6	0	0	2	2	1	0	0	0	0	0	0	0	0	0	0	0		0	0	0	0	34.7997	16.7917	0	0	0	56.0575	0	0	5.00478	26.413	19.7554	0	0	0	0	0
CHCIB 3018	L. berlandieri	60.47	0	0	0	0	2	0	0	1	0	1	0	0	0	0	0	2	0	0	2	0	0	0	0	0	0	0		0	0	0	0	13.4123	0	0	53.8306	0	0.458746	0	0	0	0	0	66.5698	0	0	189.563	0
CHCIB 3019	L. berlandieri	64.87	0	0	0	0	0	0	0	0	0	5	0	0	0	0	0	1	0	0	1	0	0	0	0	0	0	0		0	0	0	0	0	0	0	0	0	38.0459	0	0	0	0	0	97.7847	0	0	17.3293	0
CHCIB 3020	L. berlandieri	78.46	0	0	1	0	6	0	0	1	0	0	0	0	1	0	0	1	0	0	3	0	0	0	0	0	0	0		0	0	13.84	0	280.523	0	0	74.339	0	0	0	0	1.18054	0	0	72.7733	0	0	174.198	0
CHCIB 3021	L. berlandieri	50.77	0	0	0	0	0	0	0	0	0	0	0	0	2	0	0	0	0	0	0	0	0	0	0	0	0	0		0	0	0	0	0	0	0	0	0	0	0	0	4.46344	0	0	0	0	0	0	0
CHCIB 3015	L. berlandieri	57.98	0	0	1	0	0	0	0	0	0	1	0	0	2	0	3	0	0	0	1	0	0	0	0	0	0	0		0	0	0.70304	0	0	0	0	0	0	10.9571	0	0	12.3817	0	1.85491	0	0	0	278.804	0
CHCIB 3024	L. berlandieri	80.95	0	0	0	0	0	0	0	0	0	1	0	0	0	0	0	0	0	0	0	0	0	1	1	0	0	0		0	0	0	0	0	0	0	0	0	0.0775537	0	0	0	0	0	0	0	0	0	0
CHCIB 3026	L. berlandieri	72.59	0	0	0	0	1	0	0	0	0	0	0	0	0	0	0	1	0	0	0	0	0	0	2	0	0	0		0	0	0	0	200.899	0	0	0	0	0	0	0	0	0	0	39.0758	0	0	0	0
CHCIB 3068	L. berlandieri	57.21	0	0	0	0	1	0	0	0	0	0	0	0	0	0	0	0	0	0	0	0	0	0	0	0	0	0		0	0	0	0	6.06546	0	0	0	0	0	0	0	0	0	0	0	0	0	0	0
CHCIB 3069	L. berlandieri	50.61	0	0	0	0	2	0	0	0	0	0	0	0	0	0	0	0	0	0	2	0	0	0	0	0	0	0		0	0	0	0	14.8115	0	0	0	0	0	0	0	0	0	0	0	0	0	105.662	0
CHCIB 3030	L. berlandieri	65.23	0	0	0	0	0	0	0	0	0	0	0	0	0	0	0	0	0	0	1	0	0	0	0	0	0	0		0	0	0	0	0	0	0	0	0	0	0	0	0	0	0	0	0	0	38.0383	0
CHCIB 3022	L. berlandieri	48.73	0	0	0	0	1	0	0	0	0	0	0	0	0	0	0	1	0	0	0	0	0	0	0	0	0	0		0	0	0	0	101.356	0	0	0	0	0	0	0	0	0	0	5.09536	0	0	0	0
CHCIB 3059	L. berlandieri	43.25	0	0	0	0	2	0	0	0	0	0	0	0	0	0	0	0	0	0	0	0	0	0	0	0	0	0		0	0	0	0	16.1216	0	0	0	0	0	0	0	0	0	0	0	0	0	0	0
CHCIB 2995	L. berlandieri	44.31	0	0	0	0	2	0	0	0	0	2	0	0	0	0	0	0	0	0	1	0	0	0	0	0	0	0		0	0	0	0	1.38718	0	0	0	0	1.71161	0	0	0	0	0	0	0	0	3.19876	0
CHCIB 3060	L. berlandieri	46.77	0	0	0	0	2	0	0	0	0	0	0	0	0	0	0	0	0	0	0	0	0	0	0	0	0	0		0	0	0	0	13.9516	0	0	0	0	0	0	0	0	0	0	0	0	0	0	0
CHCIB 2998	L. berlandieri	46.87	0	0	0	0	1	0	0	0	0	3	0	0	0	0	0	0	0	0	1	0	0	0	0	0	0	0		0	0	0	0	8.709	0	0	0	0	5.08661	0	0	0	0	0	0	0	0	44.4128	0
CHCIB 2999	L. berlandieri	36.69	0	0	0	0	0	0	0	0	0	1	0	0	0	0	0	1	0	0	0	0	0	0	0	0	0	0		0	0	0	0	0	0	0	0	0	0.467584	0	0	0	0	0	0.235994	0	0	0	0
CHCIB 3000	L. berlandieri	34.8	0	0	0	0	0	0	1	0	0	2	0	1	2	1	0	1	0	0	0	0	0	0	0	0	0	0		0	0	0	0	0	0	0.0205503	0	0	1.89155	0	3.39038	4.41402	1.25213	0	0.253296	0	0	0	0
CHCIB 3001	L. berlandieri	35.64	0	0	1	0	2	5	0	0	0	4	0	1	1	0	0	1	0	0	0	0	0	0	0	0	0	0		0	0	0.527411	0	19.0127	3.50803	0	0	0	2.28243	0	5.73411	2.07151	0	0	0.574689	0	0	0	0
CHCIB 3002	L. berlandieri	39.59	0	0	0	0	0	2	0	0	0	0	0	0	0	0	1	0	0	0	1	0	0	0	0	0	0	0		0	0	0	0	0	70.2696	0	0	0	0	0	0	0	0	0.384915	0	0	0	80.2151	0
CHCIB 3003	L. berlandieri	34.12	0	0	0	0	0	0	0	0	0	1	0	0	0	1	0	0	0	0	0	0	0	0	0	0	0	0		0	0	0	0	0	0	0	0	0	0.373213	0	0	0	1.28774	0	0	0	0	0	0
CHCIB 3004	L. berlandieri	33.03	0	0	0	0	0	0	0	0	0	0	0	0	0	1	0	1	0	0	0	0	0	0	0	0	0	0		0	0	0	0	0	0	0	0	0	0	0	0	0	0.700339	0	1.2544	0	0	0	0
CHCIB 3013	L. berlandieri	45.13	0	0	0	0	1	0	0	0	0	0	0	0	0	0	0	0	0	0	0	0	0	0	1	0	0	0		0	0	0	0	45.8744	0	0	0	0	0	0	0	0	0	0	0	0	0	0	0
CHCIB 3027	L. berlandieri	37.8	0	0	0	0	4	0	0	1	0	6	0	0	1	1	2	1	0	0	0	0	0	0	0	0	0	0		0	0	0	0	13.0887	0	0	62.4935	0	10.0531	0	0	3.31912	6.86218	2.87421	6.20996	0	0	0	0
CHCIB 3028	L. berlandieri	43.26	0	0	0	0	1	0	0	1	0	2	0	0	0	0	1	0	0	0	2	0	0	0	0	0	0	0		0	0	0	0	6.71664	0	0	14.515	0	1.30729	0	0	0	0	10.6273	0	0	0	31.5105	0
CHCIB 4002	S. multiplicata	54.17	0	0	1	0	0	0	0	0	0	0	0	0	0	0	3	0	0	0	0	0	0	0	3	0	0	1		0	0	54.6127	0	0	0	0	0	0	0	0	0	0	0	2.01169	0	0	0	0	0
XR 0723	S. multiplicata	53.17	0	0	0	0	0	0	0	0	0	0	0	0	0	0	1	0	0	0	0	0	0	0	0	0	0	0		0	0	0	0	0	0	0	0	0	0	0	0	0	0	0.348401	0	0	0	0	0
CHCIB 5527	S. multiplicata	49.61	0	0	0	0	0	0	0	0	0	0	0	0	0	0	1	0	0	0	0	0	0	0	0	0	0	0		0	0	0	0	0	0	0	0	0	0	0	0	0	0	0.872479	0	0	0	0	0
CHCIB 5529	S. multiplicata	54.09	0	0	0	0	0	0	0	0	0	0	0	0	0	0	4	0	0	0	0	0	0	0	0	0	0	0		0	0	0	0	0	0	0	0	0	0	0	0	0	0	10.1648	0	0	0	0	0
XR 0743	S. multiplicata	49.9	0	0	1	0	1	0	0	0	0	0	0	0	0	0	0	0	0	0	0	0	0	0	0	0	0	0		0	0	37.2433	0	1.61919	0	0	0	0	0	0	0	0	0	0	0	0	0	0	0
XR 0744	S. multiplicata	49.83	0	0	0	0	0	0	0	0	0	0	0	0	0	0	1	0	0	0	1	0	0	0	0	0	0	0		0	0	0	0	0	0	0	0	0	0	0	0	0	0	0.112982	0	0	0	0.478617	0
XR 1006	S. multiplicata	57.73	0	0	0	0	0	0	0	1	0	0	0	0	0	0	0	0	0	0	0	0	0	0	0	0	0	0		0	0	0	0	0	0	0	134.352	0	0	0	0	0	0	0	0	0	0	0	0
XR 1012	S. multiplicata	57.23	0	0	0	0	1	0	0	1	0	2	0	0	0	0	0	0	0	0	0	0	0	0	0	0	0	0		0	0	0	0	12.8213	0	0	10.1117	0	1.59041	0	0	0	0	0	0	0	0	0	0
XR 1237	S. multiplicata	56.9	0	0	0	0	1	0	0	0	0	0	0	0	0	0	1	0	0	0	0	2	0	0	0	0	0	0		0	0	0	0	8.56484	0	0	0	0	0	0	0	0	0	10.5181	0	0	0	0	29.3272
XR 1270	S. multiplicata	54.09	0	0	0	0	1	0	0	0	0	0	0	0	0	0	0	0	0	0	0	0	0	0	0	0	0	0		0	0	0	0	17.0395	0	0	0	0	0	0	0	0	0	0	0	0	0	0	0
XR 1277	S. multiplicata	55.84	0	1	0	0	0	0	0	0	0	0	0	0	0	1	7	0	0	2	0	0	0	0	0	0	0	0		0	56.3232	0	0	0	0	0	0	0	0	0	0	0	1.08948	3.86349	0	0	0.701942	0	0
XR 1279	S. multiplicata	51.14	0	0	0	0	2	3	0	0	0	2	0	0	0	0	18	0	0	0	0	0	0	0	0	0	0	0		0	0	0	0	7.55413	66.6125	0	0	0	0.18737	0	0	0	0	17.954	0	0	0	0	0
CHCIB 5511	S. multiplicata	42.71	0	0	0	0	0	0	0	0	0	0	0	0	0	0	0	0	0	0	1	1	0	0	0	0	0	0		0	0	0	0	0	0	0	0	0	0	0	0	0	0	0	0	0	0	25.3449	6.15288
XR 0881	S. multiplicata	38.37	0	0	1	0	0	0	0	0	0	0	0	0	0	1	17	0	0	0	0	0	0	0	1	0	0	0		0	0	3.28508	0	0	0	0	0	0	0	0	0	0	8.79274	49.5565	0	0	0	0	0
XR 1036	S. multiplicata	44.39	0	0	0	0	0	2	0	0	0	0	0	0	0	0	3	0	0	0	0	0	0	0	1	0	0	0		0	0	0	0	0	3.6561	0	0	0	0	0	0	0	0	22.0683	0	0	0	0	0
XR 1398	S. multiplicata	36.62	0	0	0	0	0	0	0	0	0	0	0	0	0	0	4	0	0	0	0	0	0	0	0	0	0	0		0	0	0	0	0	0	0	0	0	0	0	0	0	0	4.08467	0	0	0	0	0
CHCIB 3674	S. multiplicata	12.26	5	0	2	0	27	0	2	0	0	1	0	0	0	0	2	4	0	0	0	0	0	0	0	1	0	0		0.257725	0	0.553081	0	11.6247	0	0.370972	0	0	0.154236	0	0	0	0	0.157495	1.06803	0	0	0	0
CHCIB 3675	S. multiplicata	11.98	5	0	0	0	8	0	0	0	0	0	0	0	0	0	0	0	0	0	0	0	0	0	0	0	0	0		0.391738	0	0	0	1.84146	0	0	0	0	0	0	0	0	0	0	0	0	0	0	0
CHCIB 3676	S. multiplicata	16.06	1	0	0	0	1	0	0	0	0	0	0	0	0	0	3	0	0	0	0	0	0	0	0	0	0	0		0.301341	0	0	0	0.0434095	0	0	0	0	0	0	0	0	0	1.84716	0	0	0	0	0
CHCIB 3677	S. multiplicata	14.28	0	0	0	0	2	0	0	0	0	0	0	0	0	0	5	0	0	0	0	0	0	0	0	0	0	0		0	0	0	0	0.591712	0	0	0	0	0	0	0	0	0	3.08885	0	0	0	0	0
CHCIB 3678	S. multiplicata	12.6	0	0	0	0	1	0	0	0	0	0	0	0	0	0	0	0	0	0	0	0	0	0	0	0	0	0		0	0	0	0	0.771179	0	0	0	0	0	0	0	0	0	0	0	0	0	0	0
CHCIB 3679	S. multiplicata	13.21	0	0	0	0	8	0	0	0	0	0	0	0	0	0	3	0	0	0	0	0	0	0	0	0	0	0		0	0	0	0	2.56978	0	0	0	0	0	0	0	0	0	1.12804	0	0	0	0	0
CHCIB 3680	S. multiplicata	12.45	0	0	0	0	1	0	0	0	0	0	0	0	0	0	0	0	0	0	0	0	0	0	0	0	0	0		0	0	0	0	0.153633	0	0	0	0	0	0	0	0	0	0	0	0	0	0	0
CHCIB 3681	S. multiplicata	12.69	1	0	0	0	3	0	0	0	0	0	0	0	0	0	1	0	0	0	0	0	0	0	0	0	0	0		0.012741	0	0	0	1.54511	0	0	0	0	0	0	0	0	0	0.174741	0	0	0	0	0
CHCIB 3682	S. multiplicata	12.7	5	0	0	0	3	0	0	0	0	1	0	0	0	1	0	0	0	0	0	1	0	0	0	0	0	0		0.463029	0	0	0	2.00349	0	0	0	0	0.856014	0	0	0	0.156071	0	0	0	0	0	0.302987
CHCIB 3683	S. multiplicata	11.86	0	0	0	0	7	0	0	0	0	0	0	0	0	0	0	0	0	0	0	0	0	0	0	0	0	0		0	0	0	0	8.56875	0	0	0	0	0	0	0	0	0	0	0	0	0	0	0
CHCIB 3684	S. multiplicata	13	1	0	0	0	3	0	0	0	0	0	0	0	0	0	0	0	0	0	0	0	0	0	0	0	0	0		0.0437242	0	0	0	8.72985	0	0	0	0	0	0	0	0	0	0	0	0	0	0	0
CHCIB 3685	S. multiplicata	14.31	2	0	0	0	1	0	1	0	0	0	0	0	0	0	0	0	0	0	0	0	0	0	0	0	0	0		0.0222524	0	0	0	0.1226	0	0.0117189	0	0	0	0	0	0	0	0	0	0	0	0	0
CHCIB 3686	S. multiplicata	12.44	1	0	0	0	0	0	0	0	0	0	0	0	0	0	12	0	0	0	0	0	0	0	0	0	0	0		0.0397664	0	0	0	0	0	0	0	0	0	0	0	0	0	1.712	0	0	0	0	0
CHCIB 3687	S. multiplicata	11.47	0	0	0	0	3	0	0	0	0	0	0	0	0	0	0	0	0	0	0	0	0	0	0	0	0	0		0	0	0	0	0.522855	0	0	0	0	0	0	0	0	0	0	0	0	0	0	0
CHCIB 3689	S. multiplicata	12.54	0	0	0	0	0	0	0	0	0	0	0	0	0	0	9	0	0	0	0	0	0	0	0	0	0	0		0	0	0	0	0	0	0	0	0	0	0	0	0	0	0.552986	0	0	0	0	0
CHCIB 3691	S. multiplicata	13.88	0	0	0	0	0	1	0	0	0	0	0	0	0	0	0	0	0	0	0	0	0	0	0	0	0	0		0	0	0	0	0	3.00717	0	0	0	0	0	0	0	0	0	0	0	0	0	0
CHCIB 3692	S. multiplicata	14.35	0	0	0	0	0	0	0	0	0	0	0	0	0	0	1	0	0	0	0	0	0	0	0	0	0	0		0	0	0	0	0	0	0	0	0	0	0	0	0	0	0.0591109	0	0	0	0	0
CHCIB 3693	S. multiplicata	13.89	0	0	0	0	0	0	0	0	0	0	0	0	0	1	1	0	0	0	0	0	0	0	0	0	0	0		0	0	0	0	0	0	0	0	0	0	0	0	0	0.458947	0.302987	0	0	0	0	0
CHCIB 3695	S. multiplicata	12.62	1	0	0	0	0	0	0	0	0	0	0	0	0	0	0	0	0	0	0	0	0	0	0	0	0	0		0.0264642	0	0	0	0	0	0	0	0	0	0	0	0	0	0	0	0	0	0	0
CHCIB 3697	S. multiplicata	13.22	0	0	0	0	0	0	0	0	0	0	0	0	0	0	6	0	0	0	0	0	0	0	0	0	0	0		0	0	0	0	0	0	0	0	0	0	0	0	0	0	0.263102	0	0	0	0	0
CHCIB 3698	S. multiplicata	13.66	0	0	0	0	0	0	0	0	0	0	0	0	0	1	4	0	0	0	0	0	0	0	0	0	0	0		0	0	0	0	0	0	0	0	0	0	0	0	0	0.410534	0.320697	0	0	0	0	0
CHCIB 3699	S. multiplicata	13.76	0	0	0	0	0	0	0	0	0	0	0	0	0	0	1	0	0	0	0	0	0	0	0	0	0	0		0	0	0	0	0	0	0	0	0	0	0	0	0	0	0.0869468	0	0	0	0	0
CHCIB 3700	S. multiplicata	13.53	2	0	0	0	0	0	0	0	0	0	0	0	0	0	1	0	0	0	0	0	0	0	0	0	0	0		0.132497	0	0	0	0	0	0	0	0	0	0	0	0	0	0.0135462	0	0	0	0	0
CHCIB 3703	S. multiplicata	23.38	0	0	0	0	2	0	0	0	0	0	0	0	0	2	1	9	0	0	0	0	0	0	0	0	0	0		0	0	0	0	6.63595	0	0	0	0	0	0	0	0	2.60919	0.30239	3.47271	0	0	0	0
CHCIB 3704	S. multiplicata	26.02	0	0	0	0	0	0	0	0	0	0	0	0	0	2	2	0	0	0	0	0	0	0	0	0	0	0		0	0	0	0	0	0	0	0	0	0	0	0	0	3.96078	1.89527	0	0	0	0	0
CHCIB 3705	S. multiplicata	20.54	0	0	0	0	2	0	0	0	0	0	0	0	0	0	8	0	0	0	0	0	0	0	0	0	0	0		0	0	0	0	5.98538	0	0	0	0	0	0	0	0	0	4.06141	0	0	0	0	0
CHCIB 3706	S. multiplicata	18.04	0	0	0	0	1	0	0	0	0	0	0	0	0	0	1	0	0	0	0	0	0	0	0	0	0	0		0	0	0	0	6.48397	0	0	0	0	0	0	0	0	0	0.0583145	0	0	0	0	0
CHCIB 3707	S. multiplicata	20.66	0	0	0	0	0	1	0	0	0	0	0	0	0	0	3	0	0	0	0	1	0	0	0	0	0	0		0	0	0	0	0	0.455704	0	0	0	0	0	0	0	0	1.67903	0	0	0	0	5.10887
CHCIB 3708	S. multiplicata	19.25	0	0	0	0	1	0	0	0	0	0	0	0	0	1	0	0	0	0	0	0	0	0	0	0	0	0		0	0	0	0	28.7798	0	0	0	0	0	0	0	0	1.14361	0	0	0	0	0	0
CHCIB 3709	S. multiplicata	23.02	0	0	0	0	0	0	0	0	0	1	0	0	0	0	0	0	0	0	0	0	0	0	0	0	0	0		0	0	0	0	0	0	0	0	0	0.376139	0	0	0	0	0	0	0	0	0	0
CHCIB 3716	S. multiplicata	17.45	0	0	0	0	0	0	0	0	0	1	0	0	0	0	0	0	0	0	0	0	0	0	0	0	0	0		0	0	0	0	0	0	0	0	0	0.210842	0	0	0	0	0	0	0	0	0	0
CHCIB 3717	S. multiplicata	18.97	0	0	0	0	0	0	0	0	0	0	0	0	0	0	0	0	0	1	0	0	0	0	0	0	0	0		0	0	0	0	0	0	0	0	0	0	0	0	0	0	0	0	0	0.28148	0	0
CHCIB 3720	S. multiplicata	24.04	0	0	0	0	0	0	0	0	0	0	0	0	0	0	0	0	0	1	0	0	0	0	0	0	0	0		0	0	0	0	0	0	0	0	0	0	0	0	0	0	0	0	0	0.368562	0	0
CHCIB 5512	S. multiplicata	20.38	0	0	0	0	4	1	0	0	0	1	0	0	1	0	3	3	0	46	0	1	0	0	0	0	0	0		0	0	0	0	9.61102	0.618509	0	0	0	0.6715	0	0	2.85549	0	2.11691	0.723521	0	56.888	0	15.5466
CHCIB 5513	S. multiplicata	21.48	0	0	0	0	0	0	0	0	0	0	0	0	0	0	1	0	0	0	0	0	0	0	0	0	0	0		0	0	0	0	0	0	0	0	0	0	0	0	0	0	0.245243	0	0	0	0	0
CHCIB 5530	S. multiplicata	25.48	0	0	1	0	4	0	0	2	0	1	0	0	2	1	1	2	0	10	0	1	0	0	1	0	0	0		0	0	0.555742	0	14.0637	0	0	0.557972	0	0.0191203	0	0	0.059714	0.966979	0.568301	0.953406	0	4.08555	0	0.0579045
CHCIB 5531	S. multiplicata	25.79	0	0	2	0	7	1	0	0	0	1	0	0	0	4	2	2	0	0	0	0	0	0	0	0	0	0		0	0	0.633498	0	5.46883	4.03815	0	0	0	2.01081	0	0	0	6.44356	0.930734	0.114274	0	0	0	0
CHCIB 3725	S. multiplicata	16.13	1	0	0	0	2	0	0	0	0	0	0	0	0	0	4	0	0	6	0	1	0	0	0	0	0	0		0.0159275	0	0	0	1.6464	0	0	0	0	0	0	0	0	0	0.492796	0	0	2.40149	0	19.062
XR 0916	S. multiplicata	28.72	0	0	0	0	1	0	0	0	0	0	0	0	0	0	34	0	0	0	0	0	0	0	0	0	0	0		0	0	0	0	9.98531	0	0	0	0	0	0	0	0	0	25.9834	0	0	0	0	0
CHCIB 3728	S. multiplicata	23.85	0	0	1	0	1	0	0	0	0	0	1	0	0	0	1	0	0	0	0	0	0	0	0	0	0	0		0	0	4.04165	0	2.40881	0	0	0	0	0	10.735	0	0	0	0.569404	0	0	0	0	0
CHCIB 3729	S. multiplicata	19.77	0	0	0	0	0	0	0	0	0	0	0	0	0	0	0	0	0	5	0	0	0	0	0	0	0	0		0	0	0	0	0	0	0	0	0	0	0	0	0	0	0	0	0	6.09227	0	0
CHCIB 3730	S. multiplicata	23.6	0	0	0	0	0	0	0	0	0	0	0	0	0	0	1	0	0	1	0	1	0	0	0	0	0	0		0	0	0	0	0	0	0	0	0	0	0	0	0	0	0.752321	0	0	0.226506	0	12.9002
CHCIB 3736	S. multiplicata	20.02	0	0	0	0	0	0	0	0	0	0	0	0	0	0	2	0	0	0	0	0	0	0	0	0	0	0		0	0	0	0	0	0	0	0	0	0	0	0	0	0	1.96379	0	0	0	0	0
CHCIB 3737	S. multiplicata	18	0	0	0	0	3	0	0	0	0	0	0	0	0	0	0	0	0	0	0	0	0	0	0	0	0	0		0	0	0	0	0.267645	0	0	0	0	0	0	0	0	0	0	0	0	0	0	0
CHCIB 3738	S. multiplicata	16.61	0	0	0	0	0	0	0	0	0	0	0	0	0	0	1	0	0	0	0	0	0	0	0	0	0	0		0	0	0	0	0	0	0	0	0	0	0	0	0	0	0.0594795	0	0	0	0	0
[truncated: 6 more columns]
