# Supplementary material for: Ontogenetic variation in the diet of the anuran community from a semi-arid environment in the southeastern Chihuahuan Desert
Source: PeerJ. 2019 Oct 18;7:e7908. doi: 10.7717/peerj.7908 (PMC6802674; doi:10.7717/peerj.7908)
Supplement: Supplemental Information 5 — Pairwise comparisons of diet for numeric and volumetric proportions of prey categories between anuran species, showing the two prey that contributed most to the significant differences. [file peerj-07-7908-s005.xlsx]

## Sheet: Hoja1
	Numeric proportion of prey categories								Volumetric proportion of prey categories
Comparison	R	P	Contribution (%)			Cumulative contribution (%)			R	P	Contribution (%)			Cumulative contribution (%)
			Fo	CoA		Fo	CoA				Fo	CoA		Fo	CoA
A. punctatus-D. eximius	0.11	0.003	34.7	24.61		34.7	59.31		0.121	0.003	32.16	26.22		32.16	58.38
			Fo	LeA		Fo	LeA				Fo	LeA		Fo	LeA
A. punctatus-L. berlandieri	0.497	0.001	38.43	14.01		38.43	52.44		0.484	0.001	36.94	16.77		36.94	53.71
			Fo	CoA		Fo	CoA				Fo	CoA		Fo	CoA
A. punctatus-S. multiplicata	0.134	0.014	36.02	20.26		36.02	56.28		0.164	0.006	35.2	23.4		35.2	58.61
			CoA	Fo		CoA	Fo
D. eximius-L. berlandieri	0.14	0.018	24.55	18.71		24.55	43.26		0.085	0.086	–	–		–	–
D. eximius-S. multiplicata	0.039	0.086	–	–		–	–		0.033	0.11	–	–		–	–
			Fo	CoA		Fo	CoA				CoA	Fo		CoA	Fo
L. berlandieri-S. multiplicata	0.244	0.001	23.66	17.77		23.66	41.43		0.246	0.001	19.2	17.56		19.2	36.76
